# Supplementary material for: Novel anthracene- and pyridine-containing Schiff base probe for selective “off–on” fluorescent determination of Cu2+ ions towards live cell application
Source: Royal Society of Chemistry journal article supplement (doi:10.1039/c5nj03168k), 2016-01-01
Supplement: c5nj03168k1.pdf [file c5nj03168k1.pdf]

## Supporting Information

### **Novel anthracene and pyridine comprising schiff base probe for selective “OFF-ON” fluorescent determination of Cu<sup>2+</sup> ions towards live cell application**

Turibius Simon,<sup>a</sup> Muthaiah Shellaiah,<sup>b</sup> Venkatesan Srinivasadesikan,<sup>c</sup> Ching-Chang Lin,<sup>a</sup> Fu-  
Hsiang Ko,<sup>a\*</sup> Kien Wen Sun,<sup>b</sup> and Ming-Chang Lin<sup>c</sup>

<sup>a</sup> Department of Materials Science and Engineering, National Chiao Tung University,  
Hsinchu 300, Taiwan.

<sup>b</sup> Department of Applied Chemistry, National Chiao Tung University, Hsinchu 300,  
Taiwan.

<sup>c</sup> Center for Interdisciplinary Molecular Science, Department of Applied Chemistry,  
National Chiao Tung University, Hsinchu 300, Taiwan.

*\*Corresponding Author: fhko@mail.nctu.edu.tw*

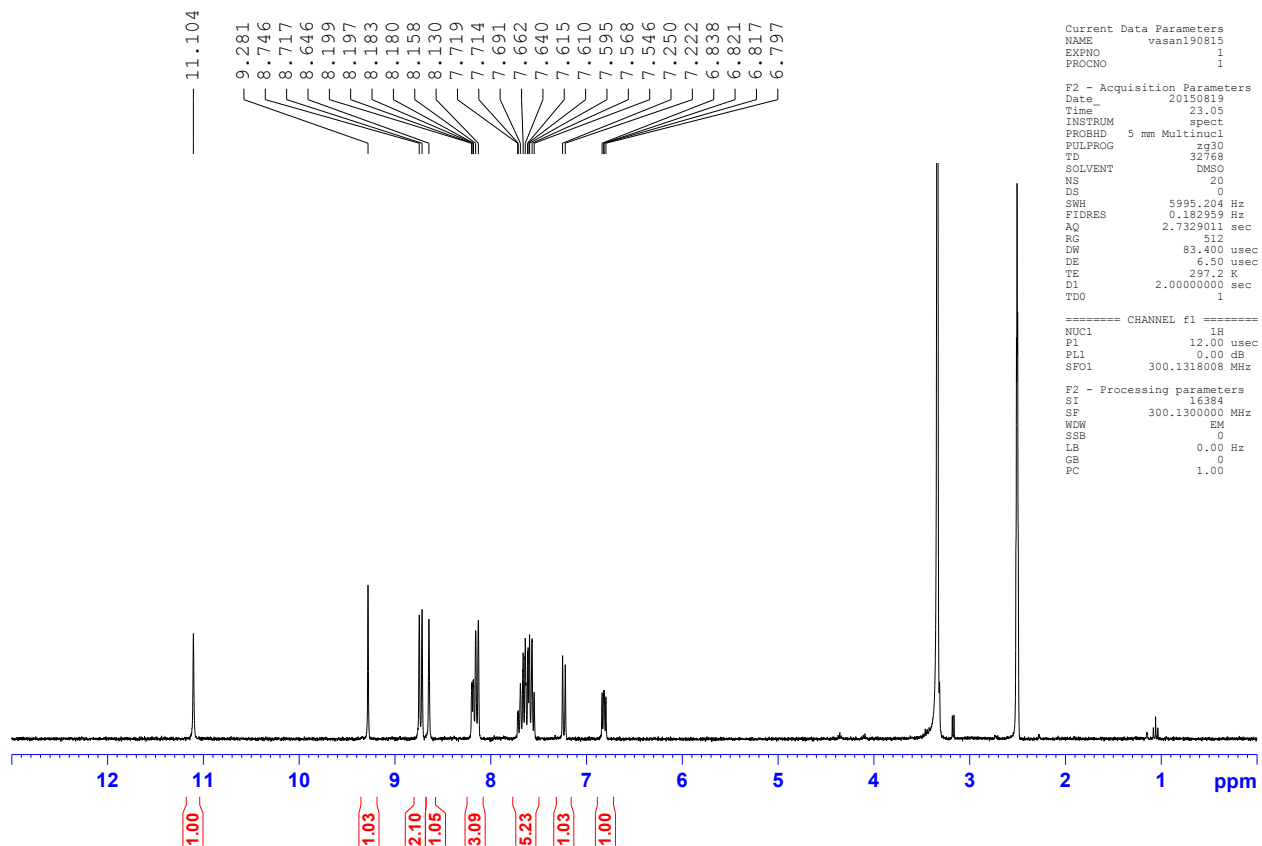

**Fig. S1**  $^1\text{H}$  NMR spectrum of AP in  $d_6$ -DMSO.

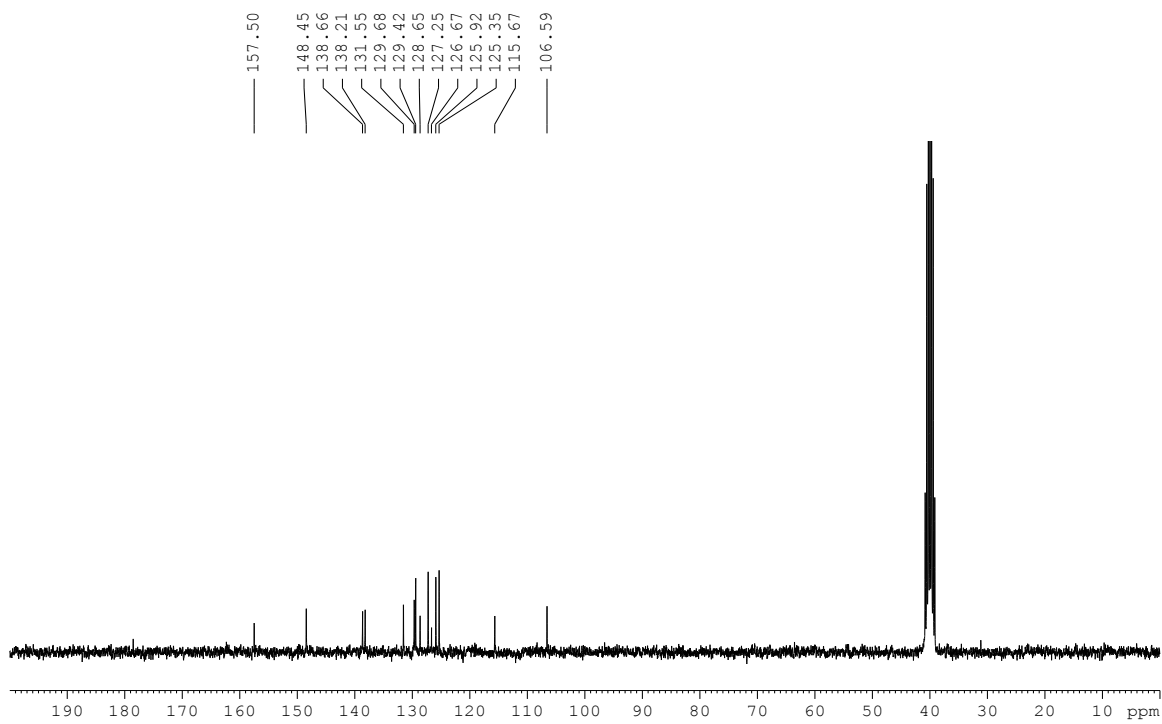

**Fig. S2**  $^{13}\text{C}$  NMR spectrum of **AP** in  $\text{d}_6\text{-DMSO}$ .

varian.ms  
File: D:\2015-03\0315\SMS0053020150318\_AHP(LR)\_ESI.trans  
Base-Peak Amplitude: 74.7943 Total Intensity: 129.836 Scans: 1 Positive Ions  
Broadband ADC Rate: 2000000 ADC Gain: X1 Transient Points: 2048K

remove noises 18-MAR-2010 10:18:24

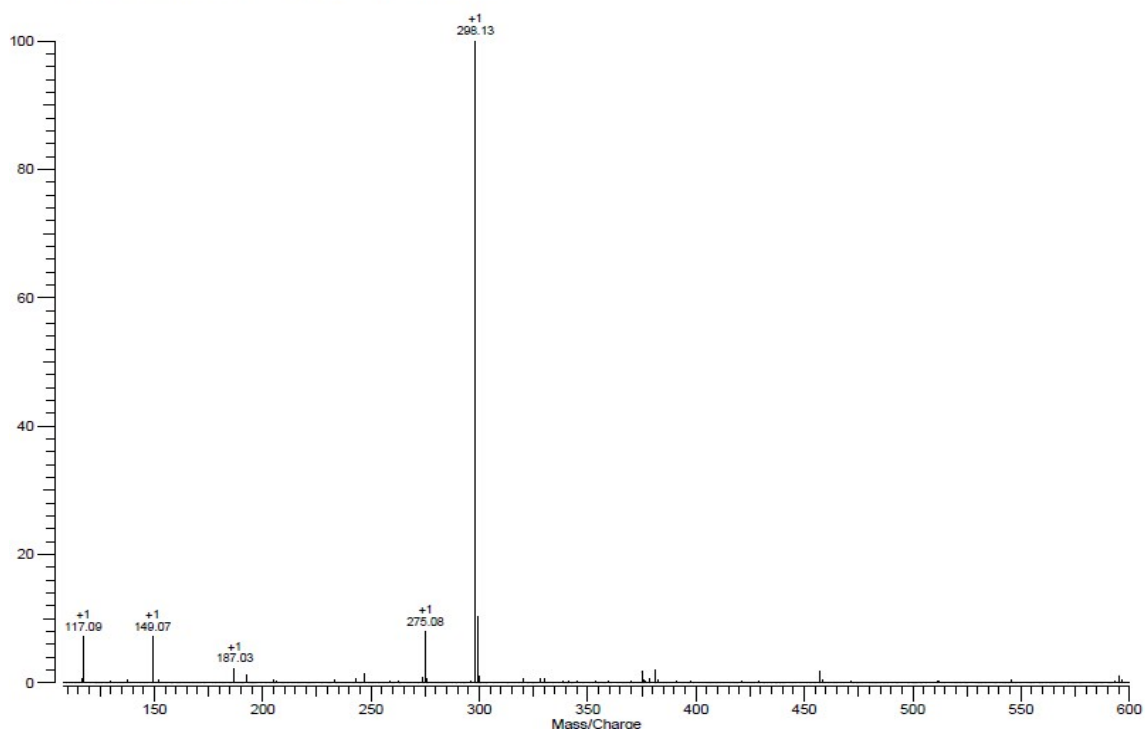

**Fig. S3** Mass (ESI) spectrum of AP.

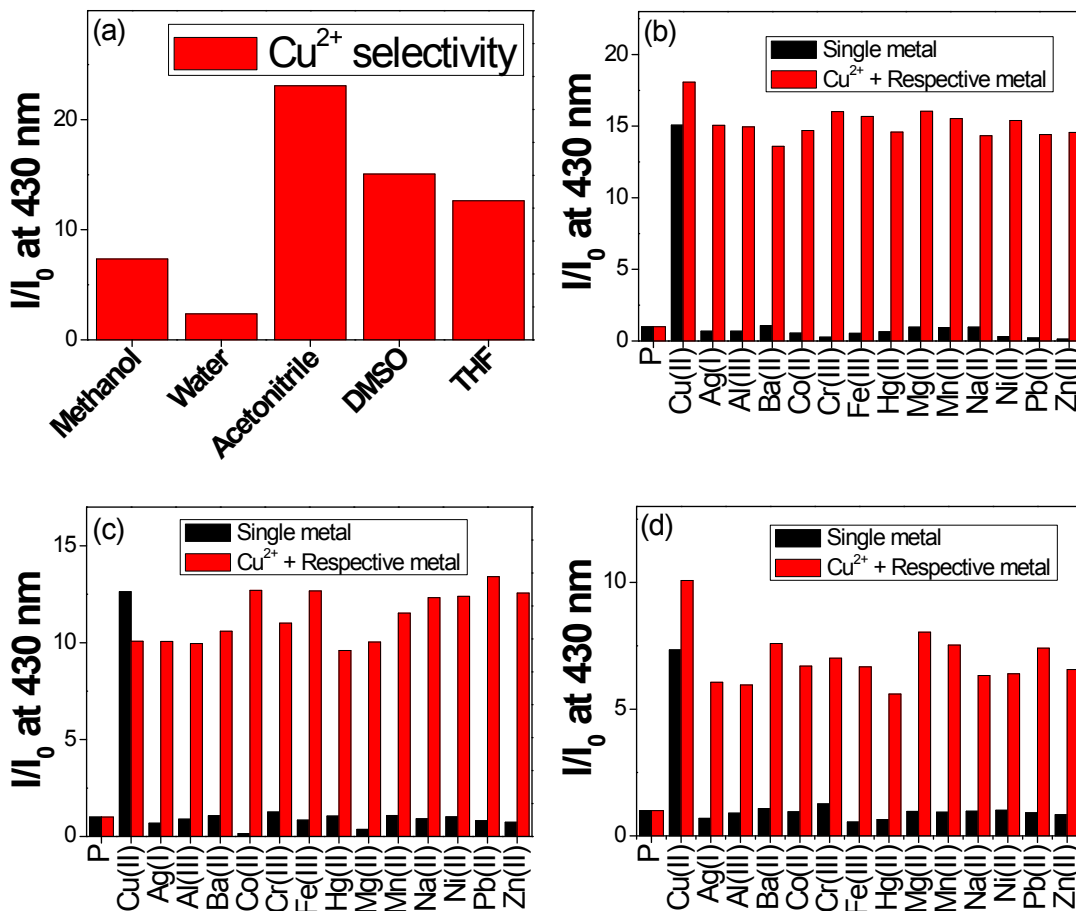

**Fig. S4** (a) Cu<sup>2+</sup> selectivity in different solvents; Histograms on single and dual metal studies of AP (20 μM in CH<sub>3</sub>CN) probe in (b) DMSO, (c) THF and (d) Methanol (Single metal studies: 30 μM of Cu<sup>2+</sup> and 150 μM of other metal ions were taken; Dual metal studies: 30 μM of Cu<sup>2+</sup> + 150 μM of other metal ions were taken; 180 μM of Cu<sup>2+</sup> ions were taken for its effect).

Remove Noises 19-FEB-2016 11:22:50

Varian MS  
File: D:\2016-02\19\MSMS0053020160219\_AHP+cu2+(HR).ESI.trans  
Base-Peak Amplitude: 10.4140 Total Intensity: 253.123 Scans: 1 Positive Ions  
Broadband ADC Rate: 2000000 ADC Gain: X1 Transient Points: 2048K

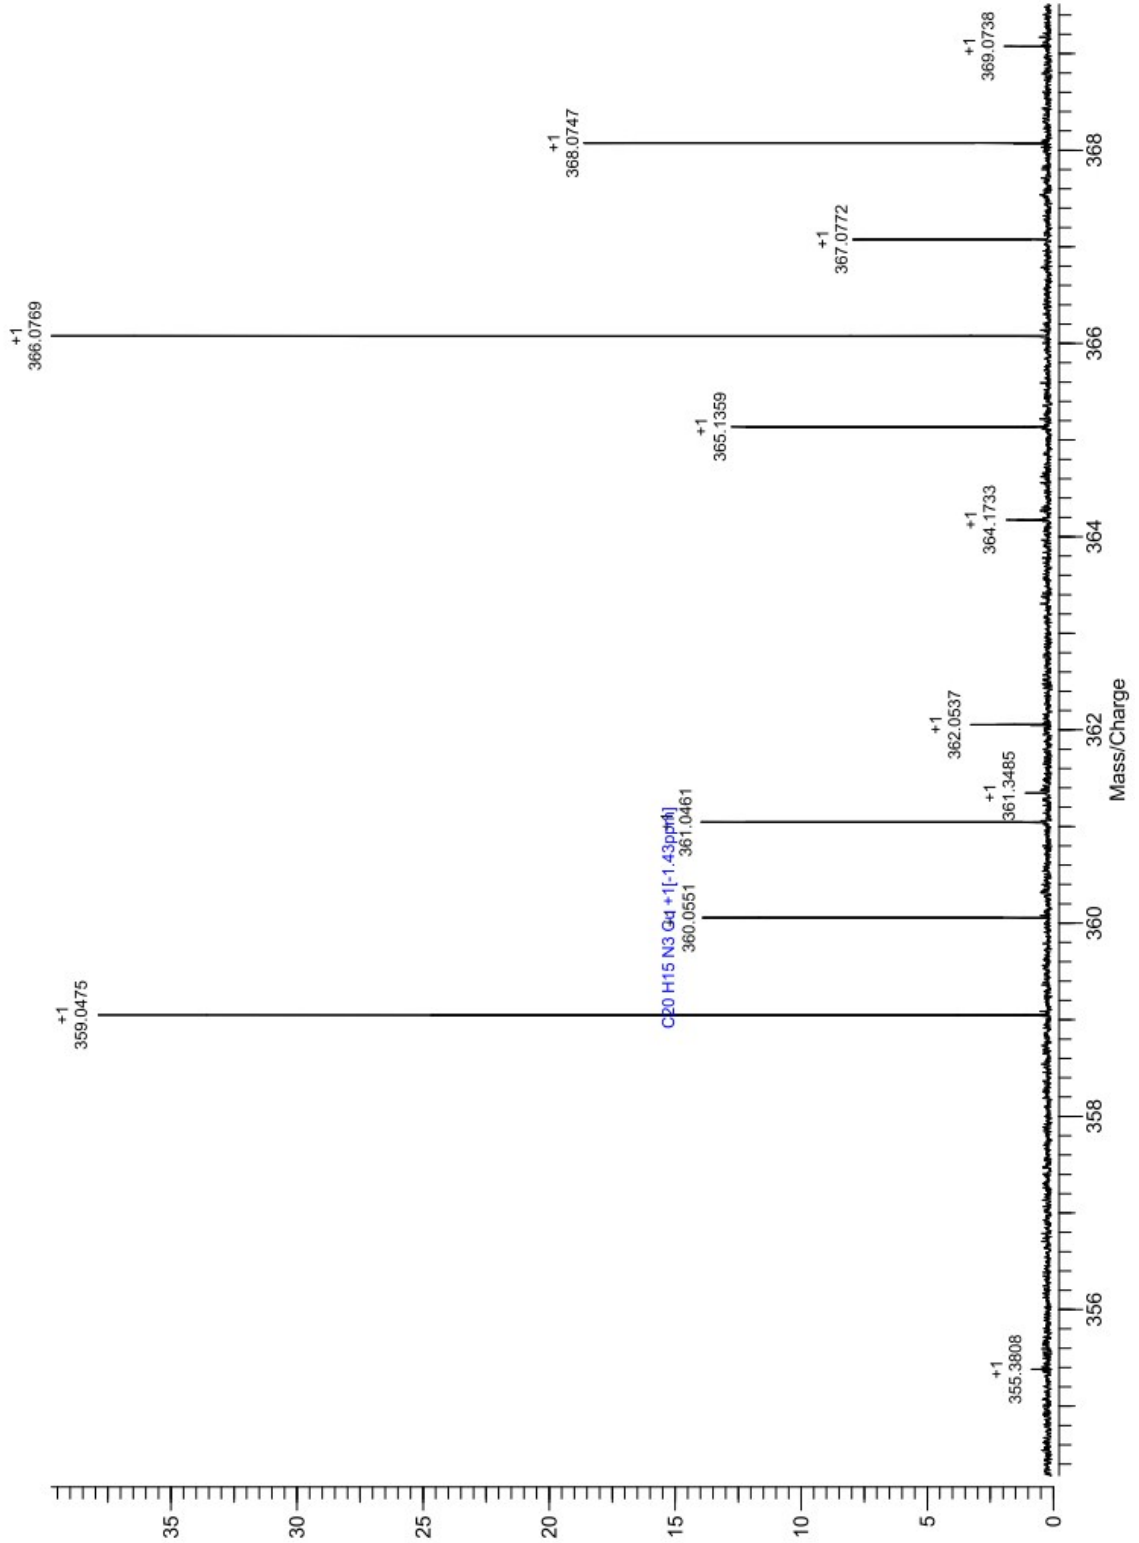

Fig. S5 HR-Mass spectrum of AP---Cu<sup>2+</sup> complex.

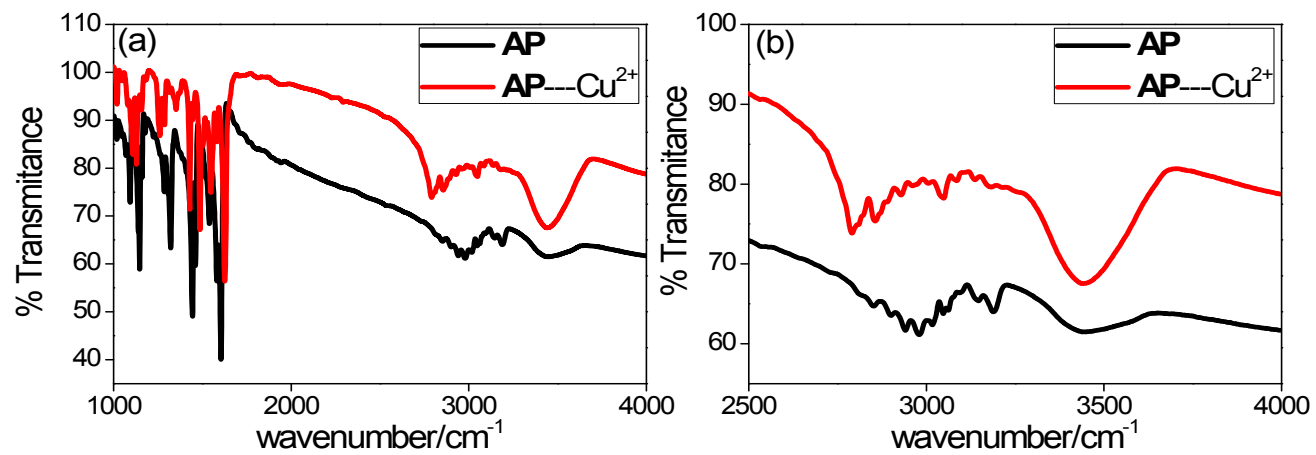

**Fig. S6** FTIR Analysis (a) AP probe and (b) AP---Cu<sup>2+</sup>.

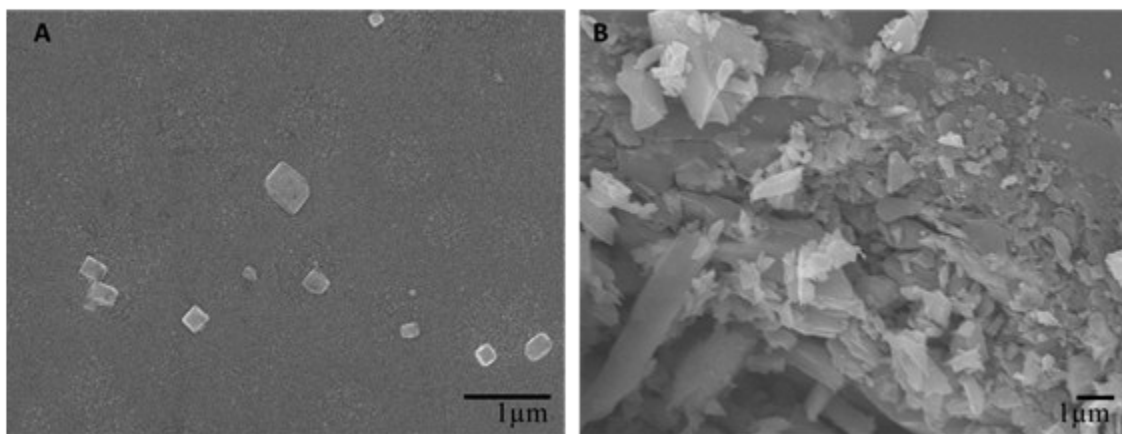

**Fig. S7** SEM Image (A) AP probe and (B) AP---Cu<sup>2+</sup>.

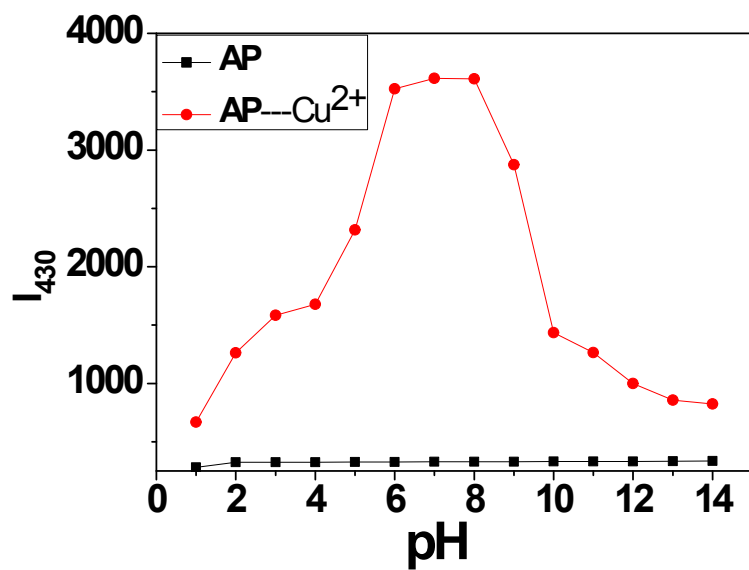

Fig. S8 pH effect on AP and AP-Cu<sup>2+</sup> sensor system.



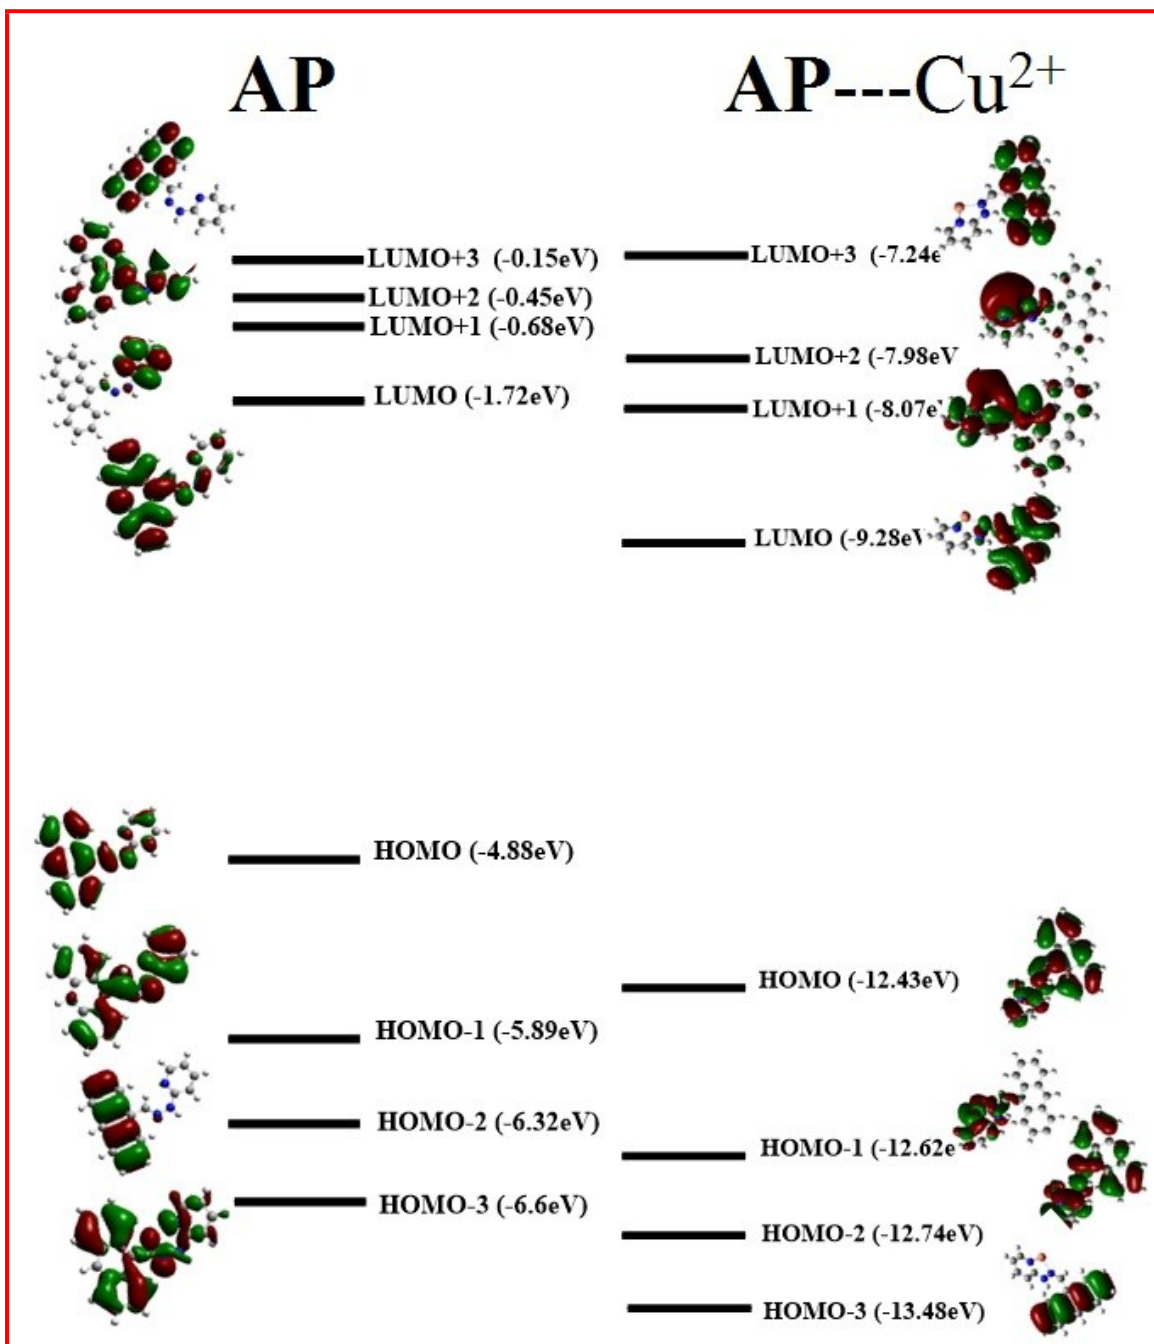

Fig. S9 HOMOs and LUMOs of AP and AP---Cu<sup>2+</sup> complex.
